# Supplementary material
Source: PubMed Central journal article supplement (PMC4241052)
Supplement: NIHMS610519-supplement-Supplement1.pdf [file NIHMS610519-supplement-Supplement1.pdf]

## Supplementary Appendix

This appendix has been provided by the authors to give readers additional information about their work.

Supplement to: The National Heart, Lung, and Blood Institute ARDS Clinical Trials Network. Rosuvastatin for sepsis-associated acute respiratory distress syndrome. *N Engl J Med* 2014;370:2191-200. DOI: 10.1056/NEJMoa1401520

# **Rosuvastatin for Sepsis Associated Acute Respiratory Distress Syndrome**

The National Heart, Lung, and Blood Institute ARDS Clinical Trials Network

The members of the Writing Committee (Jonathon D. Truwit, Gordon R. Bernard, Jay Steingrub, Michael A. Matthay, Kathleen D. Liu, Timothy E. Albertson, Roy G. Brower, Carl Shanholtz, Peter Rock, Ivor S. Douglas, Bennett P. deBoisblanc, Catherine L. Hough, R. Duncan Hite, and B. Taylor Thompson) of the National Heart, Lung, and Blood Institute Acute Respiratory Distress Syndrome (ARDS) Clinical Trials Network assume responsibility for the integrity of the article.

Supported by NIH NHLBI: HHSN268200 536165C-536179C

This document supplements the information contained in the manuscript entitled “**Rosuvastatin for Sepsis Associated Acute Respiratory Distress Syndrome.**”

## **Table of Contents**

*NIH NHLBI ARDS Clinical Trials Network Participating Institutions.....2*

### *Supplementary Figures and Tables*

|                                                                                                          |           |
|----------------------------------------------------------------------------------------------------------|-----------|
| <i>Figure S1 .....</i>                                                                                   | <i>3</i>  |
| <i>Figure S2 .....</i>                                                                                   | <i>3</i>  |
| <i>Table S1: Other exclusions referred to in Figure 1.....</i>                                           | <i>4</i>  |
| <i>Table S2: Expanded table of baseline characteristics.....</i>                                         | <i>4</i>  |
| <i>Table S3: Percent having 10mg on-study dose .....</i>                                                 | <i>7</i>  |
| <i>Table S4: Percent having 20mg on-study dose .....</i>                                                 | <i>8</i>  |
| <i>Table S5: Peak and Trough Analysis .....</i>                                                          | <i>9</i>  |
| <i>Table S6: Secondary Outcomes .....</i>                                                                | <i>9</i>  |
| <i>Table S7: On Study Tidal Volume.....</i>                                                              | <i>10</i> |
| <i>Table S8: On Study PEEP.....</i>                                                                      | <i>10</i> |
| <i>Table S9: On Study Fluid Balance.....</i>                                                             | <i>10</i> |
| <i>Table S10: On Study PaO<sub>2</sub>/FiO<sub>2</sub> .....</i>                                         | <i>11</i> |
| <i>Table S11: On Study Oxygenation Index .....</i>                                                       | <i>11</i> |
| <i>Table S12: On Study Plateau Pressure .....</i>                                                        | <i>11</i> |
| <i>Table S13: On Study Cstat .....</i>                                                                   | <i>12</i> |
| <i>Table S14: On Study Minute Ventilation .....</i>                                                      | <i>12</i> |
| <i>Table S15: On Study PaCO<sub>2</sub>.....</i>                                                         | <i>12</i> |
| <i>Table S16: On Study Arterial pH .....</i>                                                             | <i>13</i> |
| <i>Table S17: Baseline and On Study CRP.....</i>                                                         | <i>13</i> |
| <i>Table S18: On Study CRP Change from Baseline.....</i>                                                 | <i>14</i> |
| <i>Table S19: Ad hoc analysis of outcomes by PaO<sub>2</sub>/FiO<sub>2</sub> and baseline shock.....</i> | <i>15</i> |
| <i>Table S20: Baseline CK and On Study Natural Log CK Change from Baseline.....</i>                      | <i>16</i> |
| <i>Table S21: Baseline ALT and On Study Natural Log ALT Change from Baseline.....</i>                    | <i>16</i> |
| <i>Table S22: Baseline AST and On Study Natural Log AST Change from Baseline .....</i>                   | <i>17</i> |

## *NIH NHLBI ARDS Clinical Trials Network Participating Institutions*

### **The National Heart, Lung, and Blood Institute Acute Respiratory Distress Syndrome (ARDS)**

**Clinical Trials Network:** University of Washington, Harborview Medical Center (\*C. Hough, S. Gundel, L. Hudson, M. Neff, C. Johnson, K. Sims, T. Watkins); Providence-Everett Medical Center (S. Lubatti, T. Ziedalski); Swedish Medical Center (D. Finch, S. O'Mahony). Baystate Medical Center (\*J. Steingrub, M. Tidswell, L. DeSouza, C. Kardos, L. Kozikowski, S. Ouellette); Baylor College of Medicine (K. Guntupalli, V. Bandi, C. Pope, C. Ross); Johns Hopkins University (\*R. Brower, H. Fessler, D. Hager, P. Mendez-Tellez, D. Needham, K. Oakjones); Johns Hopkins Bayview Medical Center (J. Sevransky, A. Workneh); University of Maryland (C. Shanholtz, D. Herr, H. Howes, G. Netzer, P. Rock, A. Sampaio, J. Titus); Union Memorial Hospital (P. Sloane, T. Beck, D. Highfield, J. Lehmann, H. Luu); Franklin Memorial Hospital Center (S. Selinger, S. King); St Josephs Hospital of Baltimore (L. Barr); Cleveland Clinic Foundation (\*H.P. Wiedemann, R.W. Ashton, D.A. Culver, M. Ferrari, T. Frederick, J.A. Guzman, J.J. Komara Jr, A.J. Reddy, R. Schilz); University Hospitals of Cleveland (R. Hejal, M. Andrews, D. Haney); MetroHealth Medical Center (A.F. Connors, S. Lasalvia, J.D. Thornton, E.L. Warren); University of Colorado Hospital, Aurora (\*M. Moss, E.L. Burnham, L. Gray, J. Maloney, M. Mealer); Denver Health Medical Center (I. Douglas, K. Overdier, B. Thomas, K. Thompson, R. Wolken); Rose Medical Center (S. Frankel, J. McKeehan); Swedish Medical Center (M.L. Warner); Saint Anthony's Hospital (T. Boe, T. Bost, C. Higgins, K. Hodgins); Duke University (\*N. MacIntyre, L. Brown, C. Cox, M. Gentile, J. Govert, N. Knudsen); University of North Carolina (S. Carson, L. Chang, S. Choudhury, J. Lanier, J. McGuire); Vanderbilt University (\*A.P. Wheeler, G.R. Bernard, M. Hays, S. Mogan, T.W. Rice); Wake Forest University (\*R.D. Hite, P.E. Morris, M. Ragusky, B. Mirafuente); Moses Cone Memorial Hospital (P. Wright, S. Groce, J. McLean, A. Overton); University of Virginia (J. Truwit, K. Enfield, M. Marshall); Intermountain Medical Center (\*A. Morris, A.\*C. Grissom, Austin, S. Brown, J. Ferguson, H. Gallo, T. Graydon, J. Dunn, E. Hirshberg, A. Jephson, N. Kumar, M. Lanspa, R. Miller, D. Murphy, J. Orme, S. Pies, A. Stowe, L. Struck, F. Thomas, D. Ward, J. Wilson); LDS Hospital (P. Bailey, W. Beninati, L. Bezdjian, T. Clemmer, S. Rimkus, R. Tanaka, L. Weaver); McKay Dee Hospital (C. Lawton, D. Hanselman, J. Jewkes); Utah Valley Regional Medical Center (K. Sundar, W. Alward, C. Bishop, D. Eckley, D. Harris, T. Hill, B. Jensen, K. Ludwig, D. Nielsen, M. Pearce); University of California, San Francisco (\*M.A. Matthay, C.S. Calfee, B. Daniel, K.D. Liu, H. Zhou); University of California, San Francisco, Fresno (M.W. Peterson, J. Blaauw, K. Van Gundy); University of California, Davis (T. Albertson, B. Morrissey, E. Vlastelin); Stanford (J. Levitt, E. Kovoov, R. Vojnik); Mayo Clinic (\*R. Hubmayr, D. Brown, E. Festic O. Gajic, R. Hinds, S. Holets, A. Lee, I. Orengo, M. Pässe), Louisiana State University Health Sciences Center-New Orleans (\*B. deBoisblanc, A. Antoine, D. Charbonnet, P. Griffenstein, J. Hunt, M. Lammi, P. Lauto, A. Marr, G. Meyaski, C. Romaine); Ochsner Clinic Foundation (S. Jain, D. Taylor, L. Seoane). **Steering Committee** Chairman: Gordon R. Bernard. **Clinical Coordinating Center:** Massachusetts General Hospital and Harvard Medical School (\*D. Schoenfeld, A. DeBenedictis, N. Dong, E. Hammond, A. Lagakos, P. Lazar, R. Morse, C. Oldmixon, N. Ringwood, E. Smoot, B.T. Thompson, R. Wilson). **National Heart, Lung and Blood Institute:** A. Harabin, S. Bredow, M. Waclawiw, G. Weinmann.; **Data and Safety Monitoring Board:** R. G. Spragg (chair), A. Slutsky, M. Levy, B. Markovitz, E. Petkova, C. Weijer, D. Willson; **Protocol Review Committee:** J. Sznajder (chair), M. Begg, E. Israel, J. Lewis, P. Parsons, L. Gilbert-McClain.

\*Principal investigator

**Figure S1**

Log Day 6 CRP vs log Peak Rosuvastatin,  $R=0.29$ ,  $P \text{ value}=0.0005$

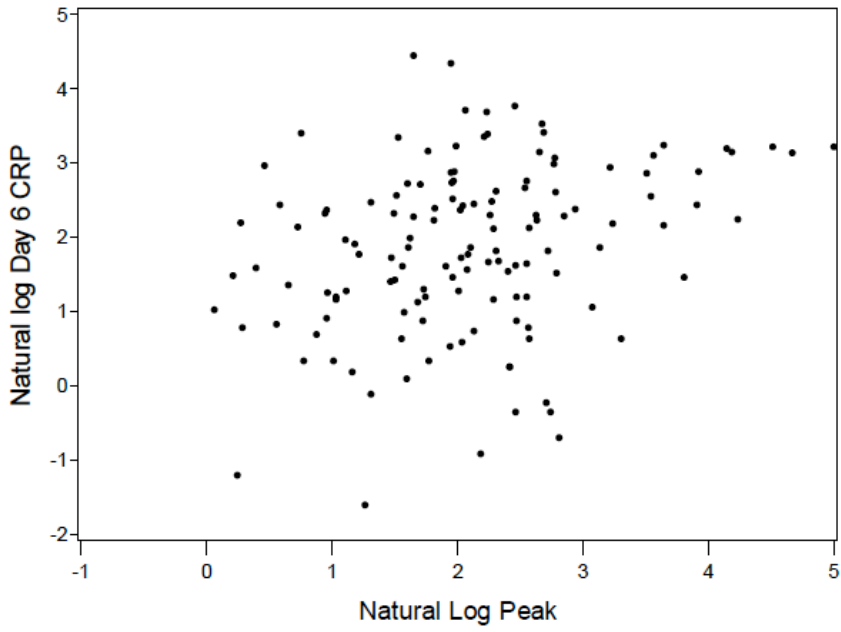

**Figure S2**

Log Day 6 CRP vs log Trough Rosuvastatin,  $R=0.27$ ,  $P \text{ value}=0.0008$

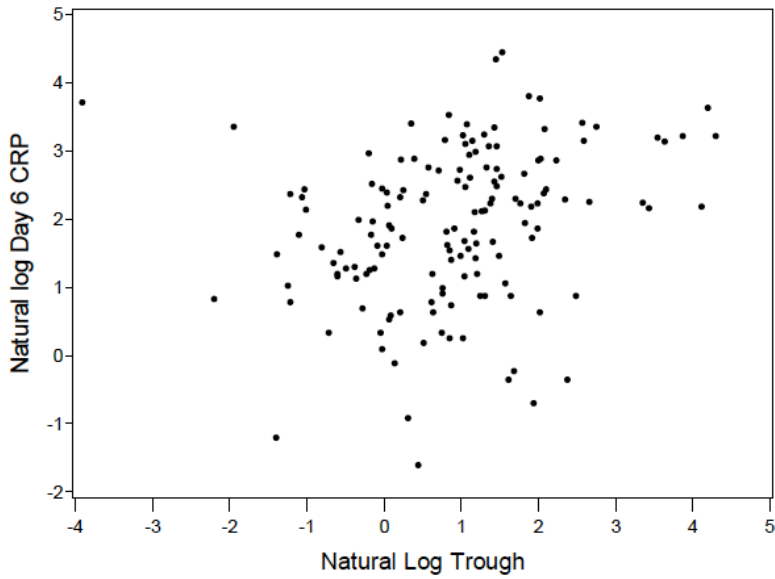

**Table S1: Other exclusions referred to in Figure 1**

| <b>711 Other exclusions in Figure 1</b>                                                                                                                      | <b>Number</b> |
|--------------------------------------------------------------------------------------------------------------------------------------------------------------|---------------|
| Receiving niacin, fenofibrate, cyclosporine, gemfibrozil, lopinavir, ritonavir or planned use of oral contraceptives or estrogen therapy during the ICU stay | 105           |
| Diffuse alveolar hemorrhage from vasculitis                                                                                                                  | 104           |
| Chronic respiratory failure defined as PaCO <sub>2</sub> > 60 mm Hg in the outpatient setting                                                                | 88            |
| Allergy or intolerance to statins                                                                                                                            | 71            |
| Intraparenchymal CNS bleed within 6 months                                                                                                                   | 71            |
| Home mechanical ventilation (noninvasive ventilation or via tracheotomy) except for CPAP/BIPAP used solely for sleep-disordered breathing                    | 62            |
| Pregnancy or breast feeding                                                                                                                                  | 50            |
| Cardiac disease classified as NYHA class IV                                                                                                                  | 47            |
| Unwillingness or inability to utilize the ARDS network 6ml / kg PBW ventilation protocol                                                                     | 44            |
| Physician insistence on AVOIDANCE of statins during the current hospitalization                                                                              | 32            |
| Burns > 40% total body surface area                                                                                                                          | 19            |
| Age less than 18 years                                                                                                                                       | 9             |
| Diagnosis of hypothyroidism and not on thyroid replacement therapy                                                                                           | 9             |

**Table S2: Expanded table of baseline characteristics**

| <b>Baseline Characteristics</b>       | <b>All Patients</b>              |                             | <b>Prior Statin Users</b>       |                            |
|---------------------------------------|----------------------------------|-----------------------------|---------------------------------|----------------------------|
|                                       | <b>Rosuvastatin<br/>(N =379)</b> | <b>Placebo<br/>(N =366)</b> | <b>Rosuvastatin<br/>(N =54)</b> | <b>Placebo<br/>(N =55)</b> |
| Age, y                                | 54.2 ± 17.1                      | 54.1 ± 15.6                 | 64.3 ± 14.6                     | 62.7 ± 12.5                |
| Women, No. (%)                        | 195 (52)                         | 185 (51)                    | 25 (46)                         | 27 (49)                    |
| White, No. (%)                        | 301 (83)                         | 289 (81)                    | 49 (93)                         | 45 (85)                    |
| Hispanic or latino, No. (%)           | 46 (12)                          | 40 (11)                     | 4 (7)                           | 6 (11)                     |
| Medical ICU, No. (%)                  | 330 (87)                         | 317 (87)                    | 51 (94)                         | 52 (95)                    |
| Primary cause of lung injury, No. (%) |                                  |                             |                                 |                            |
| Pneumonia                             | 267 (71%)                        | 260 (71%)                   | 38 (72%)                        | 37 (67%)                   |
| Non-pulmonary infection               | 72 (19%)                         | 73 (20%)                    | 9 (17%)                         | 13 (24%)                   |
| Aspiration                            | 26 (7%)                          | 23 (6%)                     | 4 (8%)                          | 3 (6%)                     |
| Other                                 | 7 (2%)                           | 4 (1%)                      | 2 (4%)                          | 2 (4%)                     |
| Multiple Transfusion                  | 3 (1%)                           | 1 (0%)                      |                                 |                            |
| Trauma                                | 2 (1%)                           | 4 (1%)                      |                                 |                            |

| Baseline Characteristics                          | All Patients             |                     | Prior Statin Users      |                    |
|---------------------------------------------------|--------------------------|---------------------|-------------------------|--------------------|
| Characteristic                                    | Rosuvastatin<br>(N =379) | Placebo<br>(N =366) | Rosuvastatin<br>(N =54) | Placebo<br>(N =55) |
| Weight, kg                                        | 88.4 ± 29.9              | 86.7 ± 30.8         | 93.2 ± 23.9             | 91.6 ± 29.6        |
| BMI †                                             | 31.0 ± 9.9               | 30.4 ± 10.1         | 32.5 ± 7.8              | 31.9 ± 8.7         |
| APACHE III score †                                | 92.1 ± 28.4              | 94.8 ± 27.9         | 94.6 ± 24.2             | 94.4 ± 25.8        |
| Diabetes, No. (%)                                 | 84 (22)                  | 86 (24)             | 26 (48)                 | 22 (40)            |
| Chronic renal failure requiring dialysis, No. (%) | 5 (1)                    | 10 (3)              | 1 (2)                   | 2 (4)              |
| Baseline shock, No. (%) †                         | 173 (46)                 | 166 (45)            | 29 (54)                 | 28 (51)            |
| Prerandomization fluid intake, mL/24 h            | 3970 ± 2386              | 4149 ± 2839         | 3341 ± 2021             | 4208 ± 2530        |
| Prerandomization fluid balance, mL/24 h           | 2128 ± 2635              | 2227 ± 3136         | 1513 ± 2286             | 2144 ± 3418        |
| Mean arterial pressure, mm Hg                     | 76.5 ± 13.5              | 77.0 ± 13.9         | 77.1 ± 16.1             | 77.5 ± 12.7        |
| Central venous pressure, mm Hg                    | 12.3 ± 4.9               | 11.2 ± 4.8*         | 12.0 ± 5.2              | 12.1 ± 5.0         |
| Tidal volume, mL/kg predicted body weight         | 6.6 ± 1.1                | 6.8 ± 1.3**         | 7.0 ± 1.6               | 6.7 ± 1.3          |
| Minute ventilation, L/min                         | 10.7 ± 3.1               | 10.8 ± 3.2          | 10.7 ± 3.6              | 11.0 ± 3.4         |
| Inspiratory plateau pressure, cm H2O              | 23.4 ± 6.6               | 23.6 ± 6.6          | 21.2 ± 5.1              | 22.6 ± 5.6         |
| PEEP, cm H2O                                      | 9.2 ± 3.7                | 9.2 ± 3.9           | 8.3 ± 2.9               | 8.4 ± 3.8          |
| PaCO2, mm Hg                                      | 39.9 ± 9.9               | 40.7 ± 11.7         | 41.0 ± 12.2             | 41.6 ± 13.5        |
| PaO2:FiO2 ratio mm Hg                             | 170 ± 71                 | 170 ± 67            | 179 ± 63                | 178 ± 78           |
| PaO2:FiO2 ratio ≤ 200, No. (%)                    | 267 (72)                 | 253 (70)            | 32 (62)                 | 33 (60)            |
| Oxygenation index cm H2O/mm Hg †                  | 10.8 ± 6.9               | 11.2 ± 8.2          | 9.3 ± 5.9               | 11.1 ± 9.6         |
| BUN, mg/dL ‡                                      | 28 ± 21                  | 28 ± 20             | 33 ± 21                 | 38 ± 20            |
| Creatinine, mg/dL ‡                               | 1.6 ± 1.3                | 1.5 ± 1.1           | 1.9 ± 1.5               | 1.8 ± 1.3          |
| Creatine kinase, U/L                              | 224 ± 417                | 214 ± 396           | 207 ± 288               | 196 ± 224          |
| Alanine aminotransferase, U/L                     | 37 ± 37                  | 36 ± 34             | 35 ± 26                 | 38 ± 35            |
| Aspartate aminotransferase, U/L                   | 54 ± 69                  | 50 ± 44             | 49 ± 45                 | 44 ± 28            |
| Hours from intubation to randomization, No. (%)   |                          |                     |                         |                    |
| ≤24 Hrs                                           | 124 (33%)                | 129 (35%)           | 17 (32%)                | 26 (47%)           |
| 24<time≤48 Hrs                                    | 204 (54%)                | 192 (53%)           | 26 (48%)                | 21 (38%)           |
| 48<time≤72 Hrs                                    | 41 (11%)                 | 31 (9%)             | 9 (17%)                 | 4 (7%)             |
| >72 Hrs                                           | 10 (3%)                  | 13 (4%)             | 2 (4%)                  | 4 (7%)             |

| Baseline Characteristics                                   | All Patients             |                     | Prior Statin Users      |                    |
|------------------------------------------------------------|--------------------------|---------------------|-------------------------|--------------------|
| Characteristic                                             | Rosuvastatin<br>(N =379) | Placebo<br>(N =366) | Rosuvastatin<br>(N =54) | Placebo<br>(N =55) |
| Unknown                                                    | 0 (0%)                   | 1 (0%)              |                         |                    |
| Hours from meeting ARDS criteria to randomization, No. (%) |                          |                     |                         |                    |
| <=24 Hrs                                                   | 192 (51%)                | 200 (55%)           | 26 (48%)                | 30 (55%)           |
| 24-48 Hrs                                                  | 184 (49%)                | 162 (44%)           | 28 (52%)                | 25 (46%)           |
| >48 Hrs                                                    | 3 (1%)                   | 4 (1%)              |                         |                    |

**Table S2. Baseline Characteristics (All patients and Prior Statin Users)**

Plus-minus values are means  $\pm$ SD. Race was assigned by the coordinators on the basis of hospital records or information from the next of kin. Because of rounding, not all percentages total 100. PEEP denotes positive end-expiratory pressure, PaO<sub>2</sub> partial pressure of arterial oxygen, PaCO<sub>2</sub> partial pressure of arterial carbon dioxide, FiO<sub>2</sub> fraction of inspired oxygen, and BUN blood urea nitrogen. Enrolled patients with non-pulmonary infections were classified as having sepsis as the primary cause of lung injury.

\*P= 0.02 \*\* p=0.04

+Body Mass Index, Calculated as weight in kilograms divided by height in meters squared.

†APACHE III denotes Acute Physiology, Age, and Chronic Health Evaluation.

Scores can range from 0 to 299, with higher scores indicating more severe illness.

|Shock was defined as a mean arterial pressure below 60 mmHg or the use of vasopressors as previously described<sup>27</sup>.

†Oxygenation Index, calculated as mean airway pressure x (FiO<sub>2</sub>/PaO<sub>2</sub>) x 100 (cm H<sub>2</sub>O/mm Hg).

‡To convert the levels for blood urea nitrogen to millimoles per liter, multiply by 0.357. To convert the levels for creatinine to micromoles per liter, multiply by 88.4.

**Table S3: Percent having 10mg on-study dose**

| Day | Placebo<br>Percent ± SE | N   | Rosuvastatin<br>Percent ± SE | N   | Overall<br>Percent ± SE | N   | P [1]       |
|-----|-------------------------|-----|------------------------------|-----|-------------------------|-----|-------------|
| 1   | 4.7% ± 1.1%             | 362 | 8.3% ± 1.4%                  | 372 | 6.5% ± 0.9%             | 734 | 0.05        |
| 2   | 5.1% ± 1.2%             | 355 | 7.7% ± 1.4%                  | 364 | 6.4% ± 0.9%             | 719 | 0.15        |
| 3   | 4.3% ± 1.1%             | 345 | 7.6% ± 1.4%                  | 353 | 6.0% ± 0.9%             | 698 | 0.07        |
| 4   | 3.8% ± 1.0%             | 339 | 5.0% ± 1.2%                  | 339 | 4.4% ± 0.8%             | 678 | 0.44        |
| 5   | 2.8% ± 0.9%             | 323 | 6.8% ± 1.4%                  | 325 | 4.8% ± 0.8%             | 648 | <b>0.02</b> |
| 6   | 2.7% ± 0.9%             | 299 | 6.3% ± 1.4%                  | 300 | 4.5% ± 0.8%             | 599 | <b>0.04</b> |
| 7   | 2.6% ± 1.0%             | 266 | 6.1% ± 1.4%                  | 279 | 4.4% ± 0.9%             | 545 | 0.06        |
| 8   | 3.9% ± 1.3%             | 231 | 7.8% ± 1.7%                  | 243 | 5.9% ± 1.1%             | 474 | 0.07        |
| 9   | 6.5% ± 1.7%             | 201 | 7.5% ± 1.8%                  | 213 | 7.0% ± 1.3%             | 414 | 0.67        |
| 10  | 3.9% ± 1.4%             | 180 | 3.7% ± 1.4%                  | 191 | 3.8% ± 1.0%             | 371 | 0.92        |
| 11  | 6.8% ± 2.0%             | 161 | 4.9% ± 1.7%                  | 164 | 5.8% ± 1.3%             | 325 | 0.46        |
| 12  | 4.1% ± 1.6%             | 146 | 4.1% ± 1.6%                  | 146 | 4.1% ± 1.2%             | 292 | 0.95        |
| 13  | 3.8% ± 1.7%             | 130 | 4.8% ± 1.9%                  | 124 | 4.3% ± 1.3%             | 254 | 0.63        |
| 14  | 2.6% ± 1.5%             | 116 | 4.6% ± 2.0%                  | 109 | 3.6% ± 1.2%             | 225 | 0.43        |
| 15  | 3.8% ± 1.9%             | 104 | 3.2% ± 1.8%                  | 94  | 3.5% ± 1.3%             | 198 | 0.78        |
| 16  | 2.4% ± 1.7%             | 83  | 4.9% ± 2.4%                  | 82  | 3.6% ± 1.5%             | 165 | 0.42        |
| 17  | 2.7% ± 1.9%             | 73  | 7.2% ± 3.1%                  | 69  | 4.9% ± 1.8%             | 142 | 0.23        |
| 18  | 1.6% ± 1.6%             | 62  | 7.6% ± 3.3%                  | 66  | 4.7% ± 1.9%             | 128 | 0.12        |
| 19  | 3.4% ± 2.4%             | 58  | 8.2% ± 3.5%                  | 61  | 5.9% ± 2.2%             | 119 | 0.25        |
| 20  | 3.6% ± 2.5%             | 55  | 6.9% ± 3.3%                  | 58  | 5.3% ± 2.1%             | 113 | 0.38        |
| 21  | 6.0% ± 3.4%             | 50  | 6.1% ± 3.4%                  | 49  | 6.1% ± 2.4%             | 99  | 1.00        |
| 22  | 4.4% ± 3.1%             | 45  | 4.4% ± 3.1%                  | 45  | 4.4% ± 2.2%             | 90  | 0.69        |
| 23  | 4.9% ± 3.4%             | 41  | 7.7% ± 4.3%                  | 39  | 6.3% ± 2.7%             | 80  | 0.81        |
| 24  | 5.3% ± 3.6%             | 38  | 10.8% ± 5.1%                 | 37  | 8.0% ± 3.1%             | 75  | 0.43        |
| 25  | 2.9% ± 2.8%             | 35  | 13.3% ± 6.2%                 | 30  | 7.7% ± 3.3%             | 65  | 0.14        |
| 26  | 2.9% ± 2.9%             | 34  | 14.8% ± 6.8%                 | 27  | 8.2% ± 3.5%             | 61  | 0.12        |
| 27  | 3.4% ± 3.4%             | 29  | 11.5% ± 6.3%                 | 26  | 7.3% ± 3.5%             | 55  | 0.25        |
| 28  | 3.6% ± 3.5%             | 28  | 12.5% ± 6.8%                 | 24  | 7.7% ± 3.7%             | 52  | 0.26        |

[1] p-value from linear model stratified over possible patient types

Rosuvastatin subjects were more likely to receive 10 mg study drug dose on study days 5 and 6. Dose is reduced to 10 mg from 20 mg for serum creatinine  $\geq 2.8$  mg/dL, provided patient not receiving renal replacement therapy. Missed doses and deaths may also impact percentages



**Table S4: Percent having 20mg on-study dose**

| Day | Placebo<br>Percent ± SE | N   | Rosuvastatin<br>Percent ± SE | N   | Overall<br>Percent ± SE | N   | P [1]       |
|-----|-------------------------|-----|------------------------------|-----|-------------------------|-----|-------------|
| 1   | 90.3% ± 1.6%            | 362 | 85.5% ± 1.8%                 | 372 | 87.9% ± 1.2%            | 734 | <b>0.04</b> |
| 2   | 89.6% ± 1.6%            | 355 | 84.3% ± 1.9%                 | 364 | 86.9% ± 1.3%            | 719 | <b>0.04</b> |
| 3   | 87.8% ± 1.8%            | 345 | 81.0% ± 2.1%                 | 353 | 84.4% ± 1.4%            | 698 | <b>0.01</b> |
| 4   | 85.8% ± 1.9%            | 339 | 82.0% ± 2.1%                 | 339 | 83.9% ± 1.4%            | 678 | 0.17        |
| 5   | 87.3% ± 1.9%            | 323 | 81.2% ± 2.2%                 | 325 | 84.3% ± 1.4%            | 648 | <b>0.03</b> |
| 6   | 86.0% ± 2.0%            | 299 | 80.0% ± 2.3%                 | 300 | 83.0% ± 1.5%            | 599 | 0.05        |
| 7   | 83.8% ± 2.3%            | 266 | 79.2% ± 2.4%                 | 279 | 81.5% ± 1.7%            | 545 | 0.16        |
| 8   | 79.7% ± 2.6%            | 231 | 74.5% ± 2.8%                 | 243 | 77.0% ± 1.9%            | 474 | 0.18        |
| 9   | 77.6% ± 2.9%            | 201 | 74.6% ± 3.0%                 | 213 | 76.1% ± 2.1%            | 414 | 0.48        |
| 10  | 77.8% ± 3.1%            | 180 | 77.0% ± 3.0%                 | 191 | 77.4% ± 2.2%            | 371 | 0.87        |
| 11  | 73.9% ± 3.5%            | 161 | 75.0% ± 3.4%                 | 164 | 74.5% ± 2.4%            | 325 | 0.81        |
| 12  | 77.4% ± 3.5%            | 146 | 70.5% ± 3.8%                 | 146 | 74.0% ± 2.6%            | 292 | 0.19        |
| 13  | 74.6% ± 3.8%            | 130 | 72.6% ± 4.0%                 | 124 | 73.6% ± 2.8%            | 254 | 0.77        |
| 14  | 74.1% ± 4.1%            | 116 | 68.8% ± 4.4%                 | 109 | 71.6% ± 3.0%            | 225 | 0.40        |
| 15  | 70.2% ± 4.5%            | 104 | 69.1% ± 4.8%                 | 94  | 69.7% ± 3.3%            | 198 | 0.88        |
| 16  | 67.5% ± 5.1%            | 83  | 67.1% ± 5.2%                 | 82  | 67.3% ± 3.7%            | 165 | 0.99        |
| 17  | 64.4% ± 5.6%            | 73  | 58.0% ± 5.9%                 | 69  | 61.3% ± 4.1%            | 142 | 0.47        |
| 18  | 61.3% ± 6.2%            | 62  | 56.1% ± 6.1%                 | 66  | 58.6% ± 4.4%            | 128 | 0.57        |
| 19  | 60.3% ± 6.4%            | 58  | 57.4% ± 6.3%                 | 61  | 58.8% ± 4.5%            | 119 | 0.75        |
| 20  | 61.8% ± 6.6%            | 55  | 62.1% ± 6.4%                 | 58  | 61.9% ± 4.6%            | 113 | 0.98        |
| 21  | 58.0% ± 7.0%            | 50  | 63.3% ± 6.9%                 | 49  | 60.6% ± 4.9%            | 99  | 0.58        |
| 22  | 53.3% ± 7.4%            | 45  | 55.6% ± 7.4%                 | 45  | 54.4% ± 5.2%            | 90  | 0.79        |
| 23  | 53.7% ± 7.8%            | 41  | 53.8% ± 8.0%                 | 39  | 53.8% ± 5.6%            | 80  | 0.94        |
| 24  | 55.3% ± 8.1%            | 38  | 51.4% ± 8.2%                 | 37  | 53.3% ± 5.8%            | 75  | 0.70        |
| 25  | 54.3% ± 8.4%            | 35  | 50.0% ± 9.1%                 | 30  | 52.3% ± 6.2%            | 65  | 0.72        |
| 26  | 55.9% ± 8.5%            | 34  | 44.4% ± 9.6%                 | 27  | 50.8% ± 6.4%            | 61  | 0.36        |
| 27  | 55.2% ± 9.2%            | 29  | 46.2% ± 9.8%                 | 26  | 50.9% ± 6.7%            | 55  | 0.47        |
| 28  | 46.4% ± 9.4%            | 28  | 33.3% ± 9.6%                 | 24  | 40.4% ± 6.8%            | 52  | 0.26        |

[1] p-value from linear model stratified over possible patient types

Rosuvastatin subjects were less likely to receive 20 mg study drug dose on study days 1,2,3,5. Dose is reduced to 10 mg from 20 mg for serum creatinine  $\geq 2.8$  mg/dL, provided patient not receiving renal replacement therapy. Missed doses and deaths may also impact percentages.

**Table S5: Peak and Trough Analysis**

|                        | PEAK<br>(n=171) | TROUGH<br>(n=187) | Half life in days<br>(n=170) | Half life in hours<br>(n=170) |
|------------------------|-----------------|-------------------|------------------------------|-------------------------------|
| Mean                   | 13.38           | 5.09              | 0.84                         | 20.10                         |
| Stdev                  | 19.21           | 10.07             | 1.00                         | 24.00                         |
| Median                 | 7.31            | 2.37              | 0.56                         | 13.40                         |
| Interquartile<br>Range | 8.67            | 3.56              | 0.43                         | 10.42                         |
| Range                  | 147.48          | 73.18             | 7.11                         | 170.57                        |
| Percentile             |                 |                   |                              |                               |
| 100% Max               | 148.00          | 73.20             | 7.22                         | 173.35                        |
| 90%                    | 33.30           | 8.17              | 1.38                         | 33.13                         |
| 75% Q3                 | 13.10           | 4.54              | 0.83                         | 19.97                         |
| 50% Median             | 7.31            | 2.37              | 0.56                         | 13.40                         |
| 25% Q1                 | 4.43            | 0.98              | 0.40                         | 9.55                          |
| 10%                    | 2.08            | 0.47              | 0.32                         | 7.61                          |
| 0% Min                 | 0.52            | 0.02              | 0.12                         | 2.78                          |

Six patients had rosuvastatin values trough>peak.

Their trough values were included in the analysis but peak values were not.

A total of 171 patients had peak rosuvastatin measurements with a mean of 13.38 ng/ml; 187 had trough measurements with a mean of 5.09 ng/ml. Log transformed trough rosuvastatin levels are positively associated with log highest on-study CK (p=0.014). Both log peak and log trough rosuvastatin levels are positively associated with log day 6 CRP and a change in the log day 6 CRP (please see the following plots). Neither peak nor trough rosuvastatin levels were associated with on-study ALT. The terminal elimination half life was calculated using peak/trough ratio (<http://www.fvet.uba.ar/equinos/8313/half-life.pdf>).

**Table S6: Secondary Outcomes**

| Outcome            | Placebo<br>Percent of<br>Patients ± SE | N   | Rosuvastatin<br>Percent of<br>Patients ± SE | N   | Overall<br>Percent of<br>Patients ± SE | N   | P [1] |
|--------------------|----------------------------------------|-----|---------------------------------------------|-----|----------------------------------------|-----|-------|
| Arrhythmias        | 8.4% ± 1.5%                            | 359 | 9.0% ± 1.5%                                 | 367 | 8.7% ± 1.0%                            | 726 | 0.75  |
| Bowel<br>Ischemia  | 1.9% ± 0.7%                            | 360 | 1.4% ± 0.6%                                 | 367 | 1.7% ± 0.5%                            | 727 | 0.55  |
| MI                 | 0.6% ± 0.4%                            | 360 | 0.5% ± 0.4%                                 | 367 | 0.6% ± 0.3%                            | 727 | 0.99  |
| Myopathy           | 8.9% ± 1.5%                            | 360 | 6.8% ± 1.3%                                 | 367 | 7.8% ± 1.0%                            | 727 | 0.30  |
| Ischemic<br>Stroke | 0.3% ± 0.3%                            | 360 | 0.3% ± 0.3%                                 | 367 | 0.3% ± 0.2%                            | 727 | 0.99  |
| VTE                | 6.9% ± 1.3%                            | 360 | 6.3% ± 1.3%                                 | 367 | 6.6% ± 0.9%                            | 727 | 0.72  |

[1] p-value from linear model stratified over possible patient types

**Table S7: On Study Tidal Volume (ml/kg PBW)**

| Day | Placebo<br>Mean ± SD | N   | Rosuvastatin<br>Mean ± SD | N   | Overall<br>Mean ± SD | N   | P<br>[1] |
|-----|----------------------|-----|---------------------------|-----|----------------------|-----|----------|
| 1   | 6.4 ± 1.1            | 246 | 6.3 ± 1.0                 | 250 | 6.4 ± 1.1            | 496 | 0.13     |
| 2   | 6.4 ± 1.1            | 196 | 6.3 ± 1.1                 | 198 | 6.3 ± 1.1            | 394 | 0.20     |
| 3   | 6.5 ± 1.4            | 171 | 6.2 ± 0.8                 | 163 | 6.4 ± 1.2            | 334 | 0.06     |
| 4   | 6.4 ± 1.2            | 145 | 6.3 ± 1.0                 | 130 | 6.3 ± 1.1            | 275 | 0.39     |
| 7   | 6.4 ± 1.6            | 91  | 6.3 ± 0.9                 | 82  | 6.4 ± 1.3            | 173 | 0.74     |
| 12  | 6.7 ± 1.8            | 38  | 6.4 ± 0.7                 | 24  | 6.6 ± 1.4            | 62  | 0.41     |
| 21  | 6.4 ± 1.5            | 17  | 6.4 ± 0.9                 | 8   | 6.4 ± 1.3            | 25  | 0.98     |
| 28  | 5.9 ± 1.2            | 10  | 6.5 ± 1.1                 | 6   | 6.2 ± 1.2            | 16  | 0.35     |

[1] p-value from linear model stratified over possible patient types

**Table S8: On Study PEEP (cm H<sub>2</sub>O)**

| Day | Placebo<br>Mean ± SD | N   | Rosuvastatin<br>Mean ± SD | N   | Overall<br>Mean ± SD | N   | P<br>[1] |
|-----|----------------------|-----|---------------------------|-----|----------------------|-----|----------|
| 1   | 8.8 ± 3.9            | 354 | 8.6 ± 3.6                 | 363 | 8.7 ± 3.7            | 717 | 0.39     |
| 2   | 8.1 ± 3.8            | 307 | 7.9 ± 3.5                 | 308 | 8.0 ± 3.7            | 615 | 0.53     |
| 3   | 8.1 ± 3.6            | 259 | 7.9 ± 3.9                 | 260 | 8.0 ± 3.8            | 519 | 0.66     |
| 4   | 7.9 ± 3.6            | 220 | 7.6 ± 3.4                 | 223 | 7.7 ± 3.5            | 443 | 0.35     |
| 7   | 7.2 ± 3.1            | 144 | 7.5 ± 3.4                 | 140 | 7.3 ± 3.2            | 284 | 0.42     |
| 12  | 7.3 ± 3.5            | 71  | 7.1 ± 2.6                 | 47  | 7.2 ± 3.1            | 118 | 0.76     |
| 21  | 6.9 ± 2.7            | 29  | 6.4 ± 2.5                 | 20  | 6.7 ± 2.6            | 49  | 0.91     |
| 28  | 6.8 ± 2.5            | 19  | 6.7 ± 2.6                 | 12  | 6.8 ± 2.5            | 31  | 0.67     |

[1] p-value from linear model stratified over possible patient types

**Table S9: On Study Fluid Balance (ml)**

| Day | Placebo<br>Mean ± SD | N   | Rosuvastatin<br>Mean ± SD | N   | Overall<br>Mean ± SD | N   | P<br>[1] |
|-----|----------------------|-----|---------------------------|-----|----------------------|-----|----------|
| 1   | 1279.9 ± 2875.5      | 364 | 1480.8 ± 2326.1           | 377 | 1382.2 ± 2610.6      | 741 | 0.29     |
| 2   | 357.6 ± 2600.5       | 361 | 182.2 ± 2553.3            | 370 | 268.8 ± 2576.5       | 731 | 0.37     |
| 3   | -128.7 ± 2214.9      | 349 | -393.7 ± 2224.3           | 359 | -263.1 ± 2222.1      | 708 | 0.12     |
| 4   | -419.1 ± 2204.3      | 329 | -515.3 ± 2266.3           | 333 | -467.4 ± 2234.5      | 662 | 0.59     |
| 5   | -230.4 ± 1999.0      | 306 | -410.2 ± 1944.7           | 311 | -321.0 ± 1972.3      | 617 | 0.25     |
| 6   | -166.1 ± 1813.9      | 274 | -118.1 ± 2079.7           | 286 | -141.6 ± 1952.6      | 560 | 0.77     |
| 7   | -219.0 ± 1776.6      | 246 | -131.5 ± 2692.4           | 264 | -173.7 ± 2294.9      | 510 | 0.68     |

[1] p-value from linear model stratified over possible patient types

**Table S10: On Study PaO<sub>2</sub>/FIO<sub>2</sub> (mm Hg)**

| Day | Placebo<br>Mean ± SD | N   | Rosuvastatin<br>Mean ± SD | N   | Overall<br>Mean ± SD | N   | P<br>[1] |
|-----|----------------------|-----|---------------------------|-----|----------------------|-----|----------|
| 1   | 192.3 ± 81.1         | 279 | 183.4 ± 77.0              | 277 | 187.9 ± 79.2         | 556 | 0.18     |
| 2   | 201.4 ± 131.9        | 239 | 208.8 ± 99.8              | 238 | 205.1 ± 117.0        | 477 | 0.48     |
| 3   | 199.6 ± 89.0         | 190 | 193.6 ± 77.0              | 197 | 196.5 ± 83.0         | 387 | 0.47     |
| 4   | 195.9 ± 79.8         | 166 | 201.2 ± 82.1              | 171 | 198.6 ± 80.9         | 337 | 0.56     |
| 7   | 207.8 ± 84.1         | 102 | 193.4 ± 69.2              | 92  | 201.0 ± 77.6         | 194 | 0.20     |
| 12  | 194.4 ± 78.8         | 52  | 215.7 ± 76.2              | 32  | 202.5 ± 78.1         | 84  | 0.28     |
| 21  | 221.2 ± 102.2        | 15  | 230.1 ± 93.6              | 12  | 225.2 ± 96.7         | 27  | 0.60     |
| 28  | 194.9 ± 133.3        | 6   | 290.4 ± 66.2              | 5   | 238.3 ± 114.5        | 11  | 0.08     |

[1] p-value from linear model stratified over possible patient types

**Table S11: On Study Oxygenation Index (cm H<sub>2</sub>O/mm Hg)**

| Day | Placebo<br>Mean ± SD | N   | Rosuvastatin<br>Mean ± SD | N   | Overall<br>Mean ± SD | N   | P<br>[1] |
|-----|----------------------|-----|---------------------------|-----|----------------------|-----|----------|
| 1   | 9.9 ± 7.5            | 271 | 10.2 ± 8.0                | 267 | 10.1 ± 7.7           | 538 | 0.58     |
| 2   | 8.8 ± 5.7            | 226 | 8.9 ± 9.9                 | 222 | 8.8 ± 8.0            | 448 | 0.95     |
| 3   | 9.0 ± 6.3            | 178 | 9.0 ± 6.2                 | 185 | 9.0 ± 6.2            | 363 | 0.91     |
| 4   | 9.1 ± 6.6            | 153 | 8.5 ± 6.7                 | 154 | 8.8 ± 6.6            | 307 | 0.45     |
| 7   | 7.6 ± 5.4            | 90  | 9.2 ± 8.0                 | 84  | 8.4 ± 6.8            | 174 | 0.12     |
| 12  | 9.9 ± 9.7            | 46  | 8.2 ± 6.6                 | 27  | 9.3 ± 8.7            | 73  | 0.44     |
| 21  | 8.0 ± 10.0           | 13  | 8.0 ± 7.6                 | 11  | 8.0 ± 8.8            | 24  | 0.65     |
| 28  | 12.9 ± 12.8          | 5   | 4.0 ± 0.9                 | 4   | 8.9 ± 10.2           | 9   | 0.10     |

[1] p-value from linear model stratified over possible patient types

**Table S12: On Study Plateau Pressure (cm H<sub>2</sub>O)**

| Day | Placebo<br>Mean ± SD | N   | Rosuvastatin<br>Mean ± SD | N   | Overall<br>Mean ± SD | N   | P<br>[1] |
|-----|----------------------|-----|---------------------------|-----|----------------------|-----|----------|
| 1   | 21.9 ± 6.2           | 230 | 22.5 ± 6.4                | 224 | 22.2 ± 6.3           | 454 | 0.30     |
| 2   | 21.9 ± 6.5           | 184 | 22.1 ± 6.2                | 171 | 21.9 ± 6.3           | 355 | 0.87     |
| 3   | 22.5 ± 5.5           | 152 | 22.0 ± 6.8                | 144 | 22.3 ± 6.2           | 296 | 0.48     |
| 4   | 22.0 ± 5.9           | 137 | 21.8 ± 6.7                | 119 | 21.9 ± 6.3           | 256 | 0.92     |
| 7   | 22.4 ± 5.4           | 72  | 22.4 ± 7.4                | 67  | 22.4 ± 6.4           | 139 | 0.90     |
| 12  | 24.5 ± 8.3           | 32  | 22.5 ± 6.4                | 20  | 23.8 ± 7.6           | 52  | 0.38     |
| 21  | 23.4 ± 6.4           | 12  | 23.0 ± 8.7                | 5   | 23.3 ± 6.9           | 17  | 0.91     |
| 28  | 22.7 ± 6.7           | 9   | 23.0 ± 1.4                | 2   | 22.7 ± 6.0           | 11  | 0.85     |

[1] p-value from linear model stratified over possible patient types

**Table S13: On Study Cstat (ml/cm H<sub>2</sub>O)**

| Day | Placebo<br>Mean ± SD | N   | Rosuvastatin<br>Mean ± SD | N   | Overall<br>Mean ± SD | N   | P<br>[1] |
|-----|----------------------|-----|---------------------------|-----|----------------------|-----|----------|
| 1   | 38.3 ± 45.0          | 200 | 35.6 ± 28.0               | 205 | 36.9 ± 37.3          | 405 | 0.41     |
| 2   | 35.8 ± 39.3          | 166 | 34.7 ± 20.9               | 157 | 35.3 ± 31.6          | 323 | 0.68     |
| 3   | 31.0 ± 14.7          | 136 | 33.7 ± 20.6               | 130 | 32.3 ± 17.8          | 266 | 0.21     |
| 4   | 34.1 ± 20.9          | 116 | 35.2 ± 22.8               | 107 | 34.6 ± 21.8          | 223 | 0.84     |
| 7   | 35.6 ± 47.2          | 67  | 32.3 ± 16.4               | 61  | 34.0 ± 35.9          | 128 | 0.64     |
| 12  | 28.3 ± 15.2          | 26  | 32.1 ± 21.0               | 20  | 30.0 ± 17.9          | 46  | 0.50     |
| 21  | 28.5 ± 11.8          | 11  | 40.1 ± 20.1               | 4   | 31.6 ± 14.6          | 15  | 0.24     |

[1] p-value from linear model stratified over possible patient types

**Table S14: On Study Minute Ventilation (l/min)**

| Day | Placebo<br>Mean ± SD | N   | Rosuvastatin<br>Mean ± SD | N   | Overall<br>Mean ± SD | N   | P<br>[1] |
|-----|----------------------|-----|---------------------------|-----|----------------------|-----|----------|
| 1   | 10.6 ± 3.2           | 348 | 10.6 ± 3.1                | 358 | 10.6 ± 3.1           | 706 | 0.93     |
| 2   | 10.7 ± 3.4           | 300 | 10.3 ± 3.2                | 297 | 10.5 ± 3.3           | 597 | 0.22     |
| 3   | 10.5 ± 3.4           | 257 | 10.3 ± 3.5                | 258 | 10.4 ± 3.5           | 515 | 0.49     |
| 4   | 10.6 ± 3.5           | 213 | 10.4 ± 3.3                | 218 | 10.5 ± 3.4           | 431 | 0.61     |
| 7   | 10.6 ± 3.6           | 138 | 10.4 ± 3.5                | 141 | 10.5 ± 3.5           | 279 | 0.73     |
| 12  | 10.1 ± 2.8           | 67  | 10.8 ± 3.7                | 48  | 10.4 ± 3.2           | 115 | 0.23     |
| 21  | 10.5 ± 3.8           | 28  | 11.3 ± 5.1                | 19  | 10.8 ± 4.3           | 47  | 0.53     |
| 28  | 10.5 ± 3.0           | 18  | 9.0 ± 2.6                 | 11  | 9.9 ± 2.9            | 29  | 0.17     |

[1] p-value from linear model stratified over possible patient types

**Table S15: On Study PaCO<sub>2</sub> (mm Hg)**

| Day | Placebo<br>Mean ± SD | N   | Rosuvastatin<br>Mean ± SD | N   | Overall<br>Mean ± SD | N   | P<br>[1] |
|-----|----------------------|-----|---------------------------|-----|----------------------|-----|----------|
| 1   | 40.6 ± 11.2          | 279 | 40.7 ± 9.8                | 277 | 40.6 ± 10.5          | 556 | 0.89     |
| 2   | 41.7 ± 10.8          | 239 | 42.4 ± 12.5               | 238 | 42.1 ± 11.7          | 477 | 0.48     |
| 3   | 42.1 ± 10.3          | 191 | 42.7 ± 10.6               | 197 | 42.4 ± 10.5          | 388 | 0.56     |
| 4   | 44.0 ± 10.8          | 167 | 44.1 ± 11.2               | 173 | 44.1 ± 11.0          | 340 | 0.85     |
| 7   | 44.8 ± 11.4          | 102 | 46.6 ± 22.5               | 93  | 45.6 ± 17.6          | 195 | 0.46     |
| 12  | 46.0 ± 11.4          | 52  | 43.5 ± 9.3                | 32  | 45.0 ± 10.7          | 84  | 0.30     |
| 21  | 50.9 ± 15.2          | 15  | 50.8 ± 13.7               | 12  | 50.9 ± 14.3          | 27  | 0.86     |
| 28  | 47.3 ± 15.2          | 6   | 46.2 ± 8.2                | 5   | 46.8 ± 11.9          | 11  | 0.79     |

[1] p-value from linear model stratified over possible patient types

**Table S16: On Study Arterial pH**

| Day | Placebo<br>Mean ± SD | N   | Rosuvastatin<br>Mean ± SD | N   | Overall<br>Mean ± SD | N   | P<br>[1] |
|-----|----------------------|-----|---------------------------|-----|----------------------|-----|----------|
| 1   | 7.38 ± 0.08          | 280 | 7.37 ± 0.09               | 277 | 7.37 ± 0.09          | 557 | 0.65     |
| 2   | 7.39 ± 0.08          | 239 | 7.39 ± 0.08               | 238 | 7.39 ± 0.08          | 477 | 0.83     |
| 3   | 7.40 ± 0.08          | 191 | 7.41 ± 0.08               | 197 | 7.40 ± 0.08          | 388 | 0.07     |
| 4   | 7.40 ± 0.07          | 167 | 7.41 ± 0.08               | 173 | 7.41 ± 0.08          | 340 | 0.26     |
| 7   | 7.41 ± 0.09          | 102 | 7.41 ± 0.08               | 93  | 7.41 ± 0.09          | 195 | 0.91     |
| 12  | 7.40 ± 0.07          | 52  | 7.39 ± 0.10               | 32  | 7.40 ± 0.08          | 84  | 0.76     |
| 21  | 7.38 ± 0.07          | 15  | 7.32 ± 0.12               | 12  | 7.35 ± 0.10          | 27  | 0.15     |
| 28  | 7.43 ± 0.03          | 6   | 7.39 ± 0.05               | 5   | 7.41 ± 0.04          | 11  | 0.22     |

[1] p-value from linear model stratified over possible patient types

**Table S17: Baseline and On Study CRP (mg/dL)**

| Day | Placebo<br>Mean ± SD (N) | Rosuvastatin<br>Mean ± SD (N) | Total<br>Mean ± SD (N) | P    |
|-----|--------------------------|-------------------------------|------------------------|------|
| 0   | 25.1 ± 24.13<br>(338)    | 27.7 ± 36.42 (361)            | 26.4 ± 31.10 (699)     | 0.26 |
| 1   | 19.9 ± 12.55 (55)        | 25.7 ± 25.00 (76)             | 23.3 ± 20.84 (131)     | 0.12 |
| 2   | 20.1 ± 12.49 (11)        | 23.0 ± 11.31 (17)             | 21.9 ± 11.65 (28)      | 0.54 |
| 3   | 10.7 ± 8.50 (25)         | 14.8 ± 10.37 (27)             | 12.8 ± 9.65 (52)       | 0.13 |
| 4   | 11.5 ± 7.93 (17)         | 15.2 ± 15.61 (18)             | 13.4 ± 12.45 (35)      | 0.38 |
| 5   | 10.5 ± 8.47 (25)         | 14.4 ± 22.06 (31)             | 12.7 ± 17.34 (56)      | 0.40 |
| 6   | 9.5 ± 10.97 (239)        | 11.6 ± 13.28 (239)            | 10.6 ± 12.21 (478)     | 0.07 |
| 7   | 10.2 ± 8.73 (34)         | 12.5 ± 11.84 (38)             | 11.4 ± 10.49 (72)      | 0.35 |
| 8   | 9.6 ± 7.37 (19)          | 6.4 ± 6.61 (11)               | 8.4 ± 7.17 (30)        | 0.24 |
| 9   | 6.0 ± 3.96 (13)          | 13.5 ± 15.18 (7)              | 8.6 ± 9.81 (20)        | 0.10 |
| 10  | 11.6 ± 16.31 (19)        | 22.5 ± 36.19 (5)              | 13.9 ± 21.36 (24)      | 0.32 |
| 14  | 8.4 ± 10.80 (115)        | 6.7 ± 7.32 (122)              | 7.5 ± 9.20 (237)       | 0.14 |
| 21  | 8.2 ± 6.06 (13)          | 9.5 ± 8.02 (10)               | 8.7 ± 6.84 (23)        | 0.68 |

Day 0 is baseline and pre-randomization.

**Table S18: On Study CRP Change from Baseline (mg/dL)**

| Day | Placebo<br>Mean ± SD (N) | Rosuvastatin<br>Mean ± SD (N) | Total<br>Mean ± SD (N) | P    |
|-----|--------------------------|-------------------------------|------------------------|------|
| 1   | -9.8 ± 39.07 (48)        | 0.9 ± 25.45 (70)              | -3.5 ± 31.99 (118)     | 0.07 |
| 2   | -4.2 ± 14.42 (11)        | -0.0 ± 10.83 (17)             | -1.7 ± 12.28 (28)      | 0.39 |
| 3   | -14.9 ± 29.65 (23)       | -4.7 ± 13.94 (26)             | -9.5 ± 23.04 (49)      | 0.12 |
| 4   | -11.1 ± 10.66 (17)       | -13.3 ± 14.87 (16)            | -12.1 ± 12.72 (33)     | 0.63 |
| 5   | -22.7 ± 48.24 (23)       | -10.5 ± 25.10 (31)            | -15.7 ± 36.87 (54)     | 0.23 |
| 6   | -15.1 ± 23.26<br>(229)   | -12.9 ± 27.79<br>(229)        | -14.0 ± 25.62<br>(458) | 0.36 |
| 7   | -13.5 ± 17.90 (31)       | -18.2 ± 14.89 (36)            | -16.0 ± 16.40 (67)     | 0.24 |
| 8   | -15.6 ± 12.07 (19)       | -22.3 ± 14.68 (11)            | -18.1 ± 13.25 (30)     | 0.19 |
| 9   | -23.4 ± 7.72 (13)        | -8.7 ± 15.97 (6)              | -18.8 ± 12.65 (19)     | 0.01 |
| 10  | -25.1 ± 42.18 (18)       | -9.6 ± 10.62 (3)              | -22.9 ± 39.43 (21)     | 0.54 |
| 14  | -14.8 ± 26.28<br>(110)   | -19.8 ± 31.23<br>(115)        | -17.3 ± 28.96<br>(225) | 0.19 |
| 21  | -12.7 ± 11.26 (13)       | -18.4 ± 20.41 (9)             | -15.1 ± 15.47 (22)     | 0.41 |

Day 0 is baseline and pre-randomization.

**Table S19: Outcomes by PaO<sub>2</sub>/FiO<sub>2</sub> (mm Hg) and baseline shock**

| Characteristic                              | Rosuvastatin   | Placebo        | Difference (95% CI) | P value |
|---------------------------------------------|----------------|----------------|---------------------|---------|
| <b>All Patients</b>                         |                |                |                     |         |
| 60-day Mortality                            |                |                |                     |         |
| 200<PaO <sub>2</sub> /FiO <sub>2</sub> ≤300 | 26/105 (24.9%) | 27/108 (25.0%) | -0.1 (-11.8, 11.5)  | 0.94    |
| PaO <sub>2</sub> /FiO <sub>2</sub> ≤200     | 79/267 (29.6%) | 61/253 (24.1%) | 5.5 (-2.1, 13.1)    | 0.13    |
| SAILS-Baseline P/F interaction              |                |                |                     | 0.43    |
| Ventilator-free days @d28                   |                |                |                     |         |
| 200<PaO <sub>2</sub> /FiO <sub>2</sub> ≤300 | 16.9 ± 10.2    | 17.0 ± 11.0    | -0.0; (-2.9, 2.8)   | 0.98    |
| PaO <sub>2</sub> /FiO <sub>2</sub> ≤200     | 4.5 ± 11.0     | 14.4 ± 11.0    | 0.0; (-1.9, 1.9)    | 0.99    |
| SAILS-Baseline P/F interaction              |                |                |                     | 0.98    |
| <b>Patients with baseline shock</b>         |                |                |                     |         |
| 60-day Mortality                            |                |                |                     |         |
| 200<PaO <sub>2</sub> /FiO <sub>2</sub> ≤300 | 14/47 (30%)    | 25/48 (31.3%)  | -1.2 (-19.8, 17.4)  | 0.87    |
| PaO <sub>2</sub> /FiO <sub>2</sub> ≤200     | 48/125 (38/4%) | 37/116 (31/9%) | 6.5 (-5.5, 18.5)    | 0.26    |
| SAILS-Baseline P/F interaction              |                |                |                     | 0.49    |
| Ventilator-free days @d28                   |                |                |                     |         |
| 200<PaO <sub>2</sub> /FiO <sub>2</sub> ≤300 | 14.9 ± 10.2    | 15.3 ± 11.2    | -0.4; (-4.8, 4.0)   | 0.85    |
| PaO <sub>2</sub> /FiO <sub>2</sub> ≤200     | 11.2 ± 11.0    | 12.4 ± 11.1    | -1.2; (-4.0, 1.6)   | 0.42    |
| SAILS-Baseline P/F interaction              |                |                |                     | 0.78    |
| <b>Patients without baseline shock</b>      |                |                |                     |         |
| 60-day Mortality                            |                |                |                     |         |
| 200<PaO <sub>2</sub> /FiO <sub>2</sub> ≤300 | 2/58 (20.7%)   | 12/60 (20.0%)  | 0.7 (-13.8, 15.2)   | 0.95    |
| PaO <sub>2</sub> /FiO <sub>2</sub> ≤200     | 31/142 (21.8%) | 24/137 (17.5%) | 4.3 (-5.0, 13.6)    | 0.33    |
| SAILS-Baseline P/F interaction              |                |                |                     | 0.68    |
| Ventilator-free days @d28                   |                |                |                     |         |
| 200<PaO <sub>2</sub> /FiO <sub>2</sub> ≤300 | 18.6 ± 9.9     | 18.3 ± 10.6    | 0.3; (-3.5, 4.1)    | 0.87    |
| PaO <sub>2</sub> /FiO <sub>2</sub> ≤200     | 17.3 ± 10.2    | 16.2 ± 10.6    | 1.1; (-1.3, 3.6)    | 0.38    |
| SAILS-Baseline P/F interaction              |                |                |                     | 0.73    |



**Table S20: Baseline CK and On Study Natural Log CK (Log IU/L) Change from Baseline**

| Day | Placebo<br>Mean ± SD (N) | Rosuvastatin<br>Mean ± SD (N) | Total<br>Mean ± SD (N)   | P    |
|-----|--------------------------|-------------------------------|--------------------------|------|
| 0   | 214.22 ± 396.30<br>(365) | 224.00 ± 417.46<br>(378)      | 219.20 ± 406.96<br>(743) | 0.74 |
| 1   | -0.03 ± 0.71 (357)       | -0.00 ± 0.77 (360)            | -0.02 ± 0.74 (717)       | 0.58 |
| 2   | 0.01 ± 1.20 (72)         | 0.04 ± 1.10 (67)              | 0.03 ± 1.15 (139)        | 0.88 |
| 3   | -0.28 ± 1.11 (308)       | -0.14 ± 1.16 (316)            | -0.21 ± 1.14 (624)       | 0.15 |
| 4   | -0.40 ± 1.60 (54)        | 0.19 ± 1.46 (57)              | -0.10 ± 1.55 (111)       | 0.05 |
| 5   | -0.32 ± 1.31 (47)        | 0.27 ± 1.65 (47)              | -0.02 ± 1.51 (94)        | 0.06 |
| 6   | -0.48 ± 1.18 (260)       | -0.23 ± 1.34 (260)            | -0.35 ± 1.27 (520)       | 0.03 |
| 7   | -0.29 ± 1.33 (40)        | 0.03 ± 1.88 (46)              | -0.12 ± 1.64 (86)        | 0.37 |
| 8   | 0.04 ± 1.94 (24)         | 0.12 ± 2.16 (28)              | 0.08 ± 2.04 (52)         | 0.89 |
| 9   | -0.57 ± 2.05 (30)        | 0.53 ± 2.03 (35)              | 0.02 ± 2.10 (65)         | 0.03 |
| 10  | -0.56 ± 1.47 (131)       | -0.23 ± 1.65 (144)            | -0.39 ± 1.57 (275)       | 0.08 |
| 14  | -0.67 ± 1.23 (125)       | -0.31 ± 1.73 (127)            | -0.49 ± 1.51 (252)       | 0.06 |
| 21  | -0.93 ± 1.28 (57)        | -0.67 ± 1.70 (59)             | -0.79 ± 1.51 (116)       | 0.36 |

Day 0 is baseline and pre-randomization.

When the numbers are small (close to 0), they approximate the percent change.

**Table S21: Baseline ALT and On Study Natural Log ALT (Log IU/L) Change from Baseline**

| Day | Placebo<br>Mean ± SD (N) | Rosuvastatin<br>Mean ± SD (N) | Total<br>Mean ± SD (N) | P    |
|-----|--------------------------|-------------------------------|------------------------|------|
| 0   | 35.69 ± 34.00<br>(366)   | 36.88 ± 36.65<br>(379)        | 36.30 ± 35.35<br>(745) | 0.65 |
| 1   | 0.06 ± 0.57 (362)        | 0.02 ± 0.41 (368)             | 0.04 ± 0.49 (730)      | 0.27 |
| 2   | 0.20 ± 0.84 (135)        | 0.12 ± 0.70 (138)             | 0.16 ± 0.77 (273)      | 0.36 |
| 3   | 0.10 ± 0.74 (326)        | 0.17 ± 0.63 (329)             | 0.14 ± 0.69 (655)      | 0.21 |
| 4   | 0.22 ± 0.88 (110)        | 0.20 ± 0.72 (127)             | 0.21 ± 0.80 (237)      | 0.90 |
| 5   | 0.35 ± 0.84 (103)        | 0.30 ± 0.80 (126)             | 0.32 ± 0.82 (229)      | 0.66 |
| 6   | 0.18 ± 0.79 (265)        | 0.31 ± 0.82 (281)             | 0.25 ± 0.81 (546)      | 0.07 |
| 7   | 0.24 ± 0.95 (96)         | 0.33 ± 0.92 (112)             | 0.29 ± 0.93 (208)      | 0.51 |
| 8   | 0.26 ± 0.88 (84)         | 0.40 ± 1.03 (85)              | 0.33 ± 0.96 (169)      | 0.37 |
| 9   | 0.14 ± 0.85 (64)         | 0.54 ± 1.07 (77)              | 0.36 ± 1.00 (141)      | 0.02 |
| 10  | 0.38 ± 0.81 (77)         | 0.42 ± 0.94 (88)              | 0.40 ± 0.88 (165)      | 0.77 |
| 14  | 0.27 ± 0.83 (130)        | 0.31 ± 0.91 (134)             | 0.29 ± 0.87 (264)      | 0.68 |
| 21  | 0.23 ± 0.74 (66)         | 0.12 ± 0.85 (66)              | 0.17 ± 0.80 (132)      | 0.45 |

Day 0 is baseline and pre-randomization.

When the numbers are small (close to 0), they approximate the percent change.

**Table S22: Baseline AST and On Study Natural Log AST (Log IU/L) Change from Baseline**

| Day | Placebo<br>Mean ± SD (N) | Rosuvastatin<br>Mean ± SD (N) | Total<br>Mean ± SD (N) | P    |
|-----|--------------------------|-------------------------------|------------------------|------|
| 0   | 49.65 ± 44.25<br>(364)   | 53.99 ± 68.53<br>(379)        | 51.86 ± 57.93<br>(743) | 0.31 |
| 1   | 0.01 ± 0.48 (85)         | 0.03 ± 0.56 (98)              | 0.02 ± 0.52 (183)      | 0.84 |
| 2   | 0.08 ± 0.55 (32)         | 0.08 ± 0.57 (41)              | 0.08 ± 0.56 (73)       | 0.99 |
| 3   | -0.04 ± 0.56 (76)        | 0.10 ± 0.61 (86)              | 0.04 ± 0.59 (162)      | 0.14 |
| 4   | -0.18 ± 0.45 (25)        | -0.02 ± 0.62 (38)             | -0.08 ± 0.56 (63)      | 0.26 |
| 5   | -0.16 ± 0.50 (24)        | 0.17 ± 0.91 (39)              | 0.05 ± 0.80 (63)       | 0.11 |
| 6   | -0.04 ± 0.62 (63)        | 0.14 ± 0.80 (80)              | 0.06 ± 0.73 (143)      | 0.16 |
| 7   | -0.15 ± 0.55 (29)        | 0.22 ± 0.81 (39)              | 0.06 ± 0.73 (68)       | 0.04 |
| 8   | -0.08 ± 0.58 (19)        | 0.21 ± 0.75 (29)              | 0.09 ± 0.70 (48)       | 0.16 |
| 9   | -0.00 ± 0.56 (21)        | 0.22 ± 0.84 (27)              | 0.12 ± 0.73 (48)       | 0.30 |
| 10  | -0.05 ± 0.59 (24)        | 0.21 ± 0.81 (31)              | 0.10 ± 0.73 (55)       | 0.20 |
| 14  | -0.18 ± 0.51 (39)        | 0.03 ± 0.80 (41)              | -0.07 ± 0.67 (80)      | 0.17 |
| 21  | -0.26 ± 0.56 (20)        | -0.31 ± 0.89 (22)             | -0.28 ± 0.74 (42)      | 0.83 |

Day 0 is baseline and pre-randomization.

When the numbers are small (close to 0), they approximate the percent change.
